# Supplementary material
Source: Springer Nature journal article supplement (https://www.springermedizin.de/resource/supplementary/13023_2010_192_MOESM3_ESM.pdf/9641830)

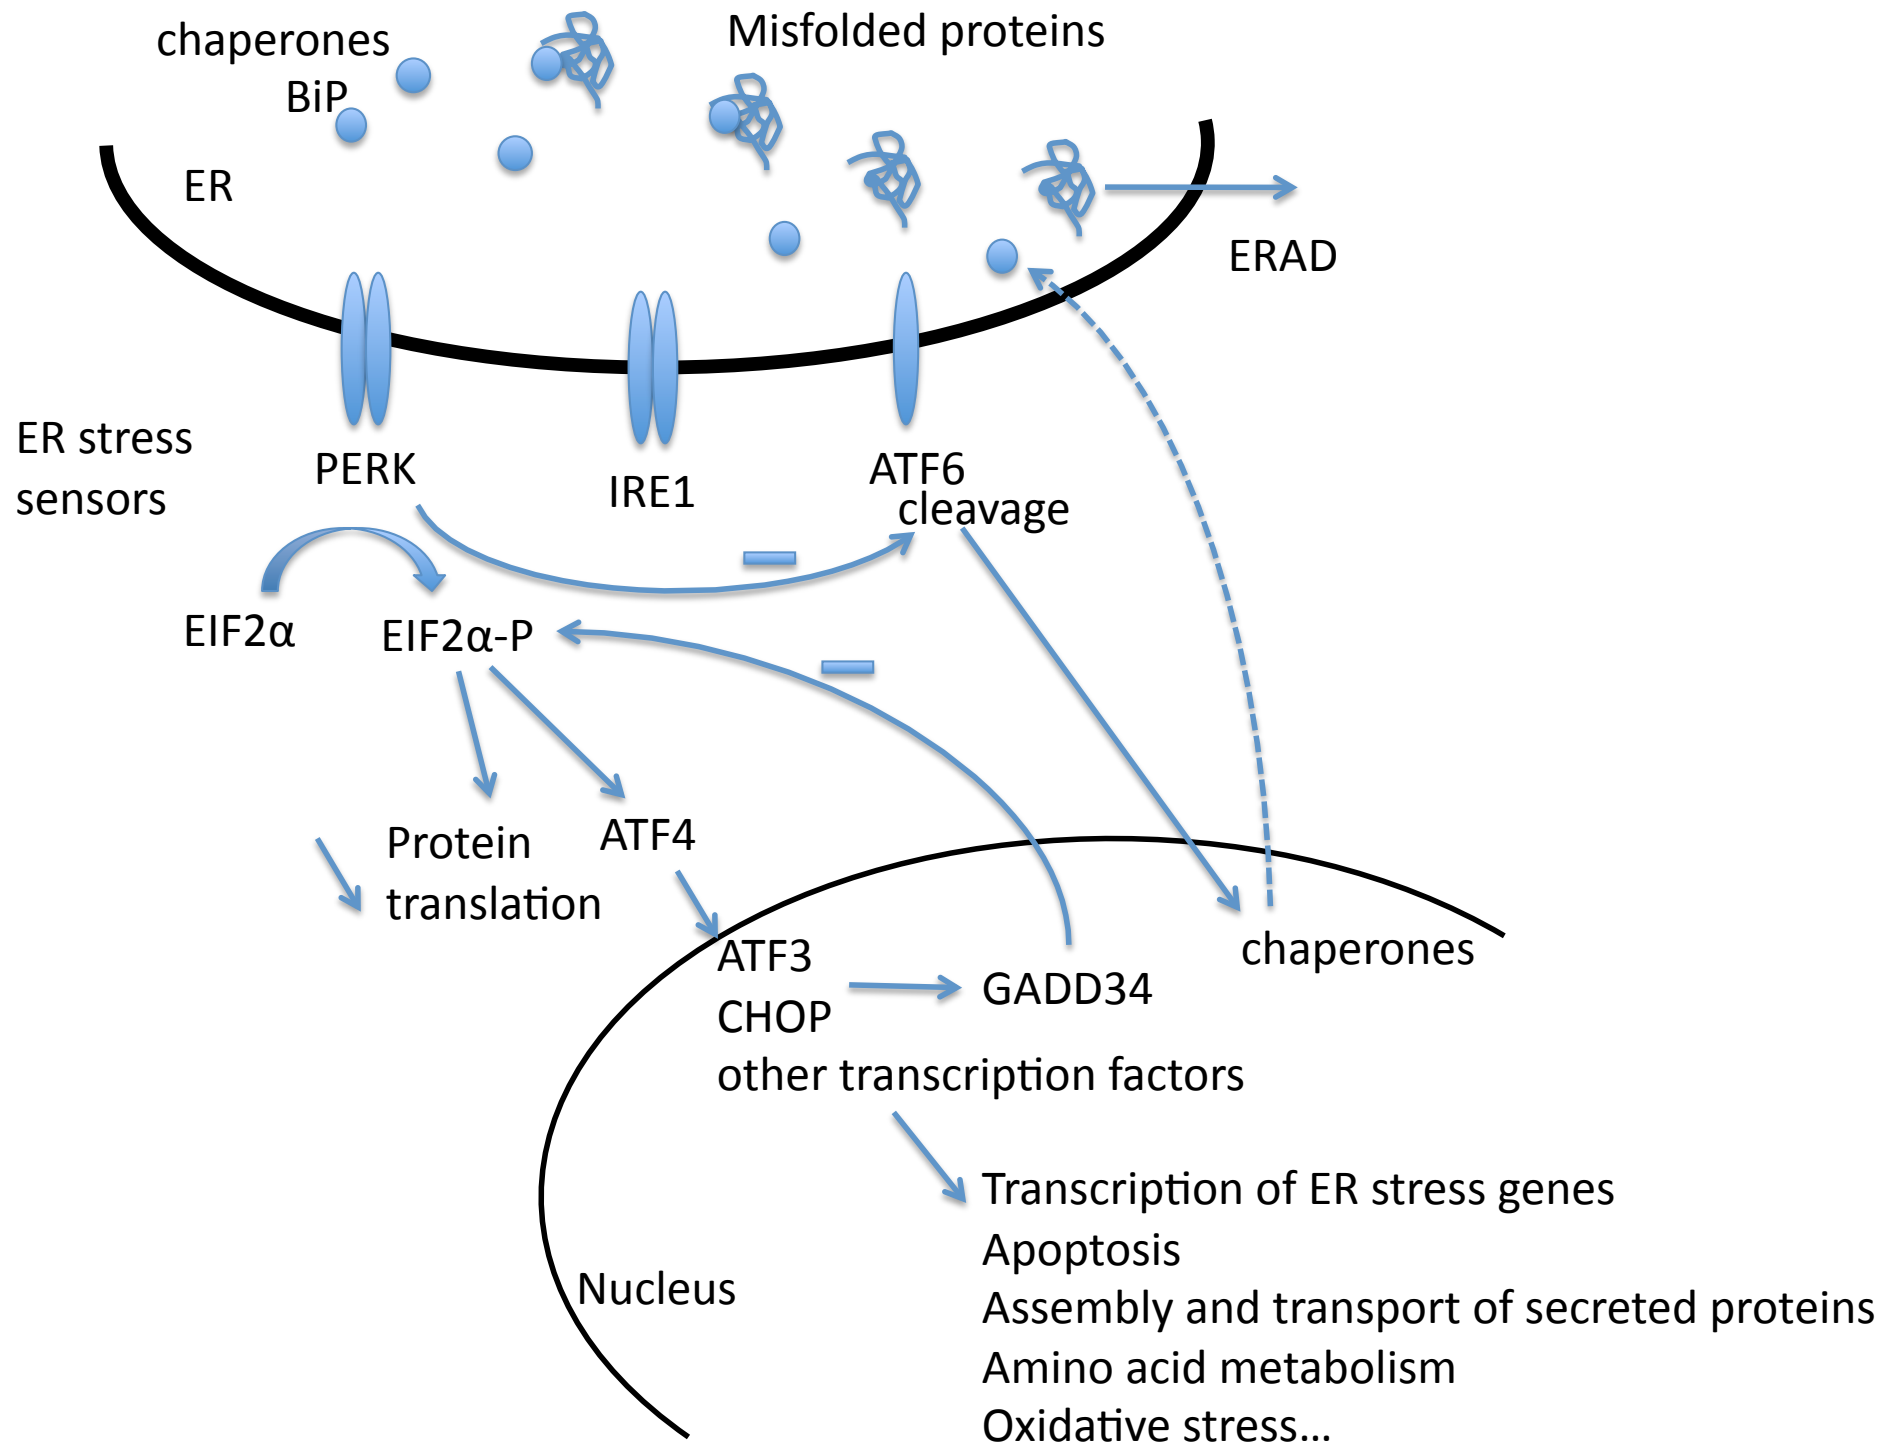

Supplement: MOESM3 [file 9641830]
